# Supplementary material for: Induction of neutralizing antibodies by human papillomavirus vaccine generated in mammalian cells
Source: PubMed Central journal article supplement — Antib Ther. 2019 Mar 4;2(2):45–53. doi: 10.1093/abt/tbz004 (PMC7990147; doi:10.1093/abt/tbz004), 2019-03-04
Supplement: supplementary_figure_legend_tbz004.pdf [file supplementary_figure_legend_tbz004.pdf]

## 1 **Supplementary Figure legend**

2 **Supplementary Figure 1.** The diagram of plasmids encoding L1 and L2 proteins of  
3 HPV16 and HPV18. The major enzymatic sites and features were indicated.

4  
5 **Supplementary Figure 2.** The neutralization end-point of the purified antibody.  
6 Green line was labeled as rabbits receiving HPV16 L1-L2 VLPs immunization, Blue  
7 line was labeled as rabbits receiving HPV18 L1-L2 VLPs immunization, Black line  
8 was labeled as rabbits receiving PBS immunization. Red line was labeled as the  
9 positive control of Heparin x 10 (The real concentration of heparin is 10 times higher  
10 than that labeled in X axis). The end-point of the anti-sera from different groups  
11 inhibiting the infection of HPV16 (A), HPV18 (B), HPV 31 (C) and HPV45 (D),  
12 respectively. (E) Summary of the neutralization end-point (IC<sub>50</sub> and IC<sub>90</sub>) of the  
13 purified antibody against different subtypes of HPV.

14  
15 **Supplementary Figure 3.** The neutralization of the third anti-sera. The blue line  
16 (YCL-01 and YCL02) indicated the animal number receiving our YCL-HPV 16/18  
17 L1-L2 VLPs immunization, the pink line (GSK-01 and GSK-02) indicated the animal  
18 number receiving the immunization of the Cervarix of GSK., the third anti-sera from  
19 different animal neutralized HPV16 (A) HPV18 (B), HPV31(C) and HPV45 (D),  
20 respectively.

21  
22 **Supplementary Figure 4.** Electron microscopy negative staining image showing  
23 VLPs based on L1-L2 protein of HPV6/11/31/52/58 at different scale as indicated.

24
